# Supplementary material for: Which positive factors determine the GP satisfaction in clinical practice? A systematic literature review
Source: PubMed Central journal article supplement (PMC5020554; doi:10.1186/s12875-016-0524-x), 2016-09-13
Supplement: 12875_2016_524_MOESM1_ESM.pdf [file 12875_2016_524_MOESM1_ESM.pdf]

| Ref in texte | First author | Title                                                                                                                                           | Year | Journal              | Langage | Country       | Aim of the study                                                                                                                                                                                                                            | Method        |
|--------------|--------------|-------------------------------------------------------------------------------------------------------------------------------------------------|------|----------------------|---------|---------------|---------------------------------------------------------------------------------------------------------------------------------------------------------------------------------------------------------------------------------------------|---------------|
| 14           | Meli DN      | General practitioner teachers' job satisfaction and their medical students' wish to join the field : a correlational study                      | 2014 | BMC Fam Pract.       | English | Switzerland   | To determine if medical students' desire to become GPs is related to the job satisfaction of their teaching GPs and explore the factors tied to this job satisfaction.                                                                      | Questionnaire |
| 15           | Goetz K      | The influence of workload and health behavior on job satisfaction of general practitioners.                                                     | 2013 | Family Medicine      | English | Germany       | To identify influencing factors on job satisfaction with regard to general practitioners' (GPs) characteristics such as age, gender, health behavior, body mass index (BMI), and workload.                                                  | Questionnaire |
| 16           | Behmann M.   | Job satisfaction among primary care physicians: Results of a survey                                                                             | 2012 | Deutsches Arzteblatt | English | Germany       | Job satisfaction among PCPs in Lower Saxony, a large federal state in Germany.                                                                                                                                                              | Questionnaire |
| 17           | Shrestha D   | Aspects of work-life balance of Australian general practitioners: determinants and possible consequences                                        | 2011 | Aust J Prim Health.  | English | Australia     | To investigate the extent, determinants and possible consequences of work-life balance of Australian GPs.                                                                                                                                   | Questionnaire |
| 18           | McGrail MR   | Professional satisfaction in general practice: does it vary by size of community?                                                               | 2010 | Med J Aust.          | English | Australia     | To investigate whether the level of professional satisfaction of Australian general practitioners varies according to community size and location.                                                                                          | Questionnaire |
| 19           | Noonan T     | When should I do rural general practice? A qualitative study of job/life satisfaction of male rural GPs of differing ages in New Zealand.       | 2008 | N Z Med J.           | English | New Zealand   | To investigate the perceived advantages and disadvantages of rural general practice at various stages of family life of male NZ-trained GPs.                                                                                                | SS Interviews |
| 20           | Geneau R     | Primary care practice a la carte among GPs: using organizational diversity to increase job satisfaction.                                        | 2007 | Fam Pract.           | English | Canada        | To elicit its different facets and to understand better how organizational factors affect it.                                                                                                                                               | SS Interviews |
| 21           | Lepnum R     | Factors associated with career satisfaction among general practitioners in Canada                                                               | 2007 | Can J Rural Med.     | English | Canada        | To articulate models that explain career satisfaction among general practitioners (GPs) in these practice environments.                                                                                                                     | Questionnaire |
| 22           | Manca DP     | Rewards and challenges of family practice: Web-based survey using the Delphi method                                                             | 2007 | Can Fam Physician.   | English | Canada        | To identify and describe the important rewards and challenges that affect family physicians in Alberta.                                                                                                                                     | Delphi method |
| 23           | Rivet C      | Hands on: is there an association between doing procedures and job satisfaction?                                                                | 2007 | Can Fam Physician.   | English | Canada        | To determine whether there is a relationship in family medicine between higher overall job satisfaction and doing a wider range of procedures.                                                                                              | Questionnaire |
| 24           | Walker KA    | What keeps Melbourne GPs satisfied in their jobs?                                                                                               | 2007 | Aust Fam Physician.  | English | Australia     | To investigate strategies that maintain and improve Melbourne (Victoria) GP job satisfaction.                                                                                                                                               | Questionnaire |
| 25           | Backer EL    | The characteristics of successful family physicians in rural Nebraska: a qualitative study of physician interviews                              | 2006 | J Rural Health.      | English | United states | To explore rural physicians' unique characteristics affecting their decisions and satisfactions with practice in a rural area.                                                                                                              | SS Interviews |
| 26           | Fairhurst K  | What general practitioners find satisfying in their work: implications for health care system reform.                                           | 2006 | Ann Fam Med.         | English | Scotland      | To explore general practitioners' satisfaction with their patient visits and the congruity between this satisfaction and new models of practice, such as those implicit in the new general medical services contract in the United Kingdom. | SS Interviews |
| 27           | Chan BT      | Factors influencing family physicians to enter rural practice: does rural or urban background make a difference?                                | 2005 | Can Fam Physician    | English | Canada        | To examine where rural physicians grew up, when during their training they became interested in rural medicine                                                                                                                              | Questionnaire |
| 28           | Rourke JT    | Relationship between practice location of Ontario family physicians and their rural background or amount of rural medical education experience. | 2005 | Can J Rural Med      | English | Canada        | To determine if there was a difference in rural background and rural medical education experience between practising rural physicians and practising urban physicians in Ontario.                                                           | Questionnaire |
| 29           | Carek PJ     | Practice profiles, procedures, and personal rewards according to the sex of the physician.                                                      | 2003 | South Med J.         | English | United states | To explore physician and practice characteristics according to sex.                                                                                                                                                                         | Questionnaire |
| 30           | Shanley BC   | Factors influencing career development of Australian general practitioners.                                                                     | 2002 | Aust Fam Physician.  | English | Australia     | To evaluate factors influencing career experiences and career choices made by former general practitioner registrars and to ascertain the reasons for these career decisions.                                                               | Questionnaire |
