# Supplementary material for: Which positive factors determine the GP satisfaction in clinical practice? A systematic literature review
Source: PubMed Central journal article supplement (PMC5020554; doi:10.1186/s12875-016-0524-x), 2016-09-13
Supplement: 12875_2016_524_MOESM2_ESM.pdf [file 12875_2016_524_MOESM2_ESM.pdf]

| N° of the reference in the text | Articles<br>First author, year | General professional theme  |                                                     | Specific GP's practice                                                  |                                               |                                                      |                                                   |                                                                               |                                               |                                       |                                                             |                                        | Professional and private life     |                         | Number of code by article |
|---------------------------------|--------------------------------|-----------------------------|-----------------------------------------------------|-------------------------------------------------------------------------|-----------------------------------------------|------------------------------------------------------|---------------------------------------------------|-------------------------------------------------------------------------------|-----------------------------------------------|---------------------------------------|-------------------------------------------------------------|----------------------------------------|-----------------------------------|-------------------------|---------------------------|
|                                 |                                | Workload balance and income | Responsibilities and recognition of quality of work | Successful medical management of patient<br>Feelings of being competent | Freedom to choose workplace and organise work | Vocational choice; be able to be the doctor you want | Role of GP's personality, gender, physical health | Intellectual stimulation to use abilities; continual professional development | Relationship with patients and their families | Relationship with other professionals | Variety in clinical practice; other professional challenges | Teaching and academic responsibilities | Supporting influence of community | Influence of the family |                           |
| 14                              | Meli DN; 2014                  | X                           | X                                                   |                                                                         | X                                             |                                                      |                                                   | X                                                                             |                                               | X                                     | X                                                           |                                        |                                   |                         | 6                         |
| 15                              | Goetz K, 2013                  | X                           | X                                                   |                                                                         | X                                             |                                                      | X                                                 |                                                                               |                                               | X                                     | X                                                           |                                        |                                   |                         | 6                         |
| 16                              | Behmann M.; 2012               | X                           |                                                     |                                                                         | X                                             |                                                      | X                                                 | X                                                                             | X                                             | X                                     |                                                             |                                        |                                   |                         | 6                         |
| 17                              | Shrestha D, 2011               | X                           |                                                     |                                                                         | X                                             |                                                      | X                                                 |                                                                               |                                               |                                       |                                                             |                                        | X                                 | X                       | 5                         |
| 18                              | McGrail MR, 2010               | X                           | X                                                   |                                                                         | X                                             |                                                      |                                                   | X                                                                             |                                               | X                                     | X                                                           |                                        | X                                 | X                       | 8                         |
| 19                              | Noonan T, 2008                 | X                           |                                                     |                                                                         |                                               |                                                      |                                                   |                                                                               | X                                             |                                       | X                                                           |                                        | X                                 | X                       | 5                         |
| 20                              | Geneau R, 2007                 | X                           | X                                                   | X                                                                       | X                                             | X                                                    |                                                   | X                                                                             | X                                             | X                                     | X                                                           |                                        |                                   |                         | 9                         |
| 21                              | Lepnurm R, 2007                | X                           | X                                                   |                                                                         | X                                             |                                                      | X                                                 |                                                                               |                                               | X                                     |                                                             | X                                      | X                                 | X                       | 8                         |
| 22                              | Manca DP, 2007                 | X                           |                                                     |                                                                         | X                                             |                                                      |                                                   | X                                                                             | X                                             |                                       | X                                                           | X                                      |                                   |                         | 6                         |
| 23                              | Rivet C, 2007                  | X                           |                                                     |                                                                         | X                                             |                                                      | X                                                 | X                                                                             | X                                             |                                       |                                                             | X                                      | X                                 | X                       | 8                         |
| 24                              | Walker KA, 2007                | X                           |                                                     | X                                                                       | X                                             |                                                      |                                                   | X                                                                             | X                                             |                                       | X                                                           |                                        |                                   |                         | 6                         |
| 25                              | Backer EL, 2006                |                             | X                                                   | X                                                                       | X                                             | X                                                    |                                                   | X                                                                             | X                                             |                                       | X                                                           |                                        | X                                 | X                       | 9                         |
| 26                              | Fairhurst K, 2006              |                             |                                                     | X                                                                       |                                               | X                                                    |                                                   | X                                                                             | X                                             |                                       |                                                             |                                        |                                   |                         | 4                         |
| 27                              | Chan BT, 2005                  |                             |                                                     |                                                                         |                                               | X                                                    | X                                                 | X                                                                             |                                               |                                       |                                                             | X                                      | X                                 | X                       | 6                         |
| 28                              | Rourke JT, 2005                |                             |                                                     |                                                                         | X                                             |                                                      |                                                   |                                                                               |                                               |                                       |                                                             | X                                      | X                                 | X                       | 4                         |
| 29                              | Carek PJ, 2005                 | X                           |                                                     |                                                                         | X                                             | X                                                    |                                                   | X                                                                             |                                               |                                       |                                                             |                                        |                                   | X                       | 5                         |
| 30                              | Shanley BC, 2002               | X                           |                                                     | X                                                                       |                                               | X                                                    | X                                                 | X                                                                             |                                               |                                       | X                                                           | X                                      | X                                 | X                       | 9                         |
| Number of studies on the topic  |                                | <b>13</b>                   | <b>6</b>                                            | <b>5</b>                                                                | <b>13</b>                                     | <b>6</b>                                             | <b>7</b>                                          | <b>12</b>                                                                     | <b>8</b>                                      | <b>6</b>                              | <b>9</b>                                                    | <b>6</b>                               | <b>9</b>                          | <b>10</b>               |                           |
